# Supplementary material for: Breast Cancer: An Examination of the Potential of ACKR3 to Modify the Response of CXCR4 to CXCL12
Source: Int J Mol Sci. 2018 Nov 14;19(11):3592. doi: 10.3390/ijms19113592 (PMC6274818; doi:10.3390/ijms19113592)
Supplement: Supplementary file 1 [file ijms-19-03592-s001.zip › ijms-365067-SI.pdf]

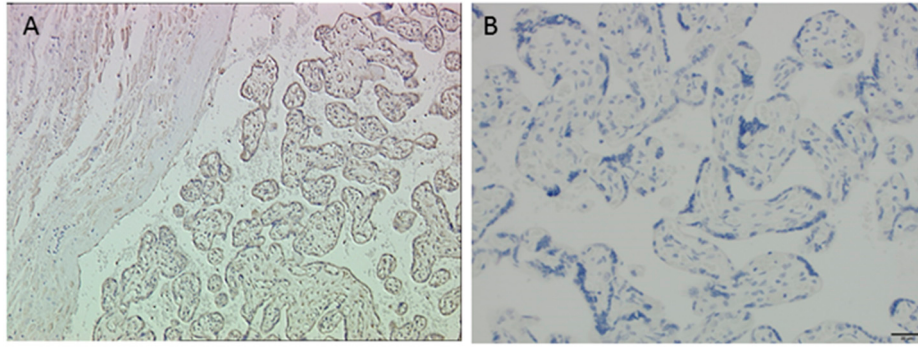

**Figure S1.** Controls for ACKR3. 4  $\mu$ m sections from human placenta were stained for (A) ACKR3 (1:100) or (B) incubated with pre-immune rabbit serum using immunohistochemistry following antigen retrieval pre-treatment (EDTA antigen retrieval). Briefly, protocol from the VECTASTAIN ABC HRP kit was followed, signal was developed using DAB (brown stain) and counterstained with haematoxylin (blue).

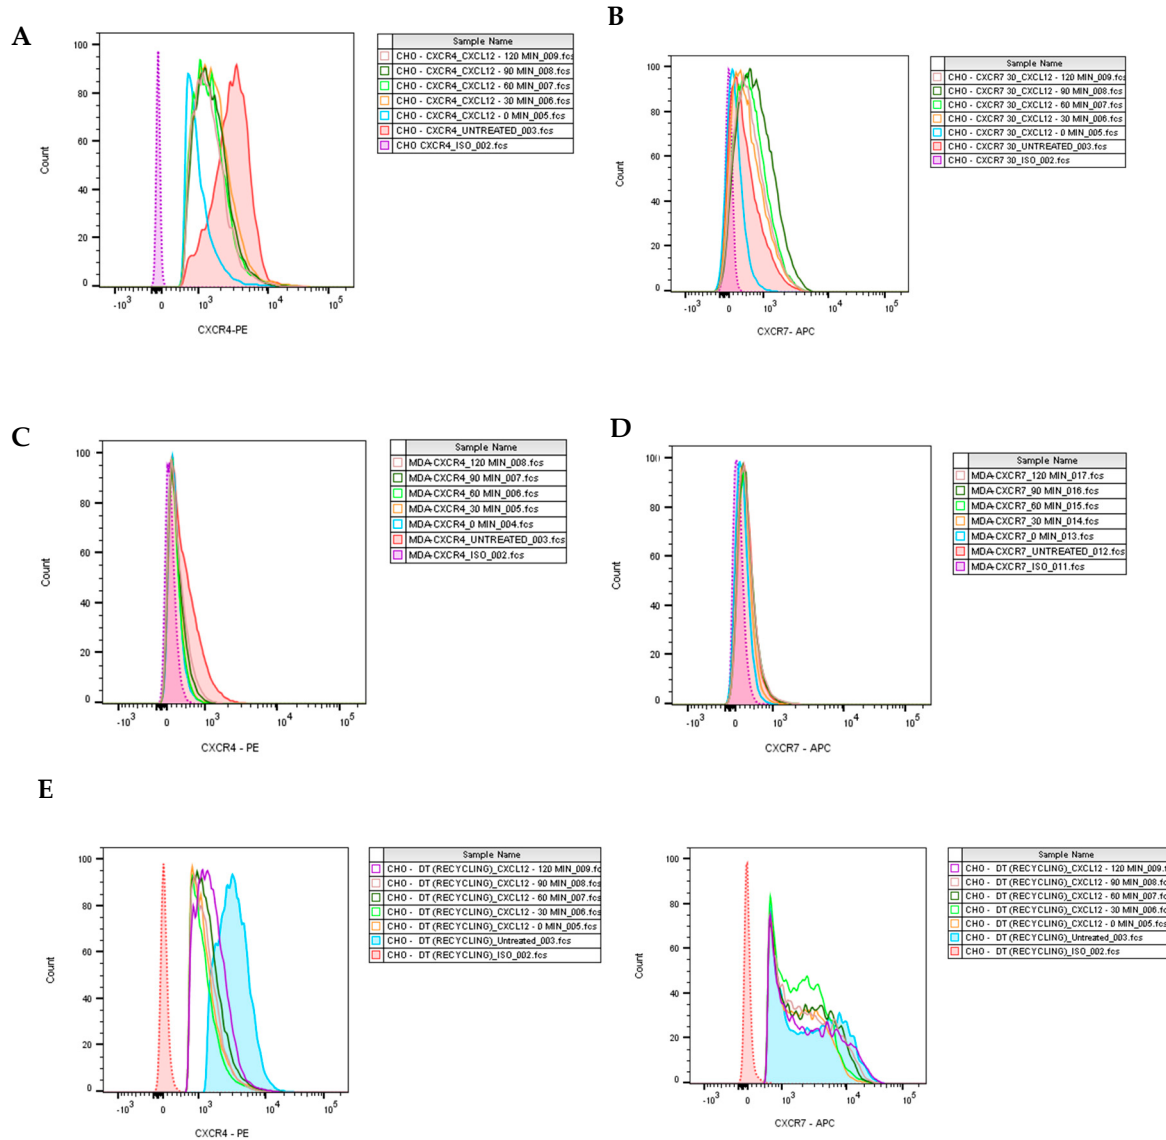

**Figure S2.** CXCR4 and ACKR3 follow different internalization pathways after CXCL12 stimulation. (A) CHO-CXCR4, (B) CHO-ACKR3, (C) MDA-MB-231-CXCR4, (D) MDA-MB-231-ACKR3 and (E) CHO-CXCR4-ACKR3 cells were treated with 10–50 nM CXCL12 for 15–30 min, then washed and incubated with chemokine-free media for up to 2 h to assess receptor recycling. Cells were labelled with CXCR4-PE and/or ACKR3-APC antibody and representative histograms of the staining are depicted.

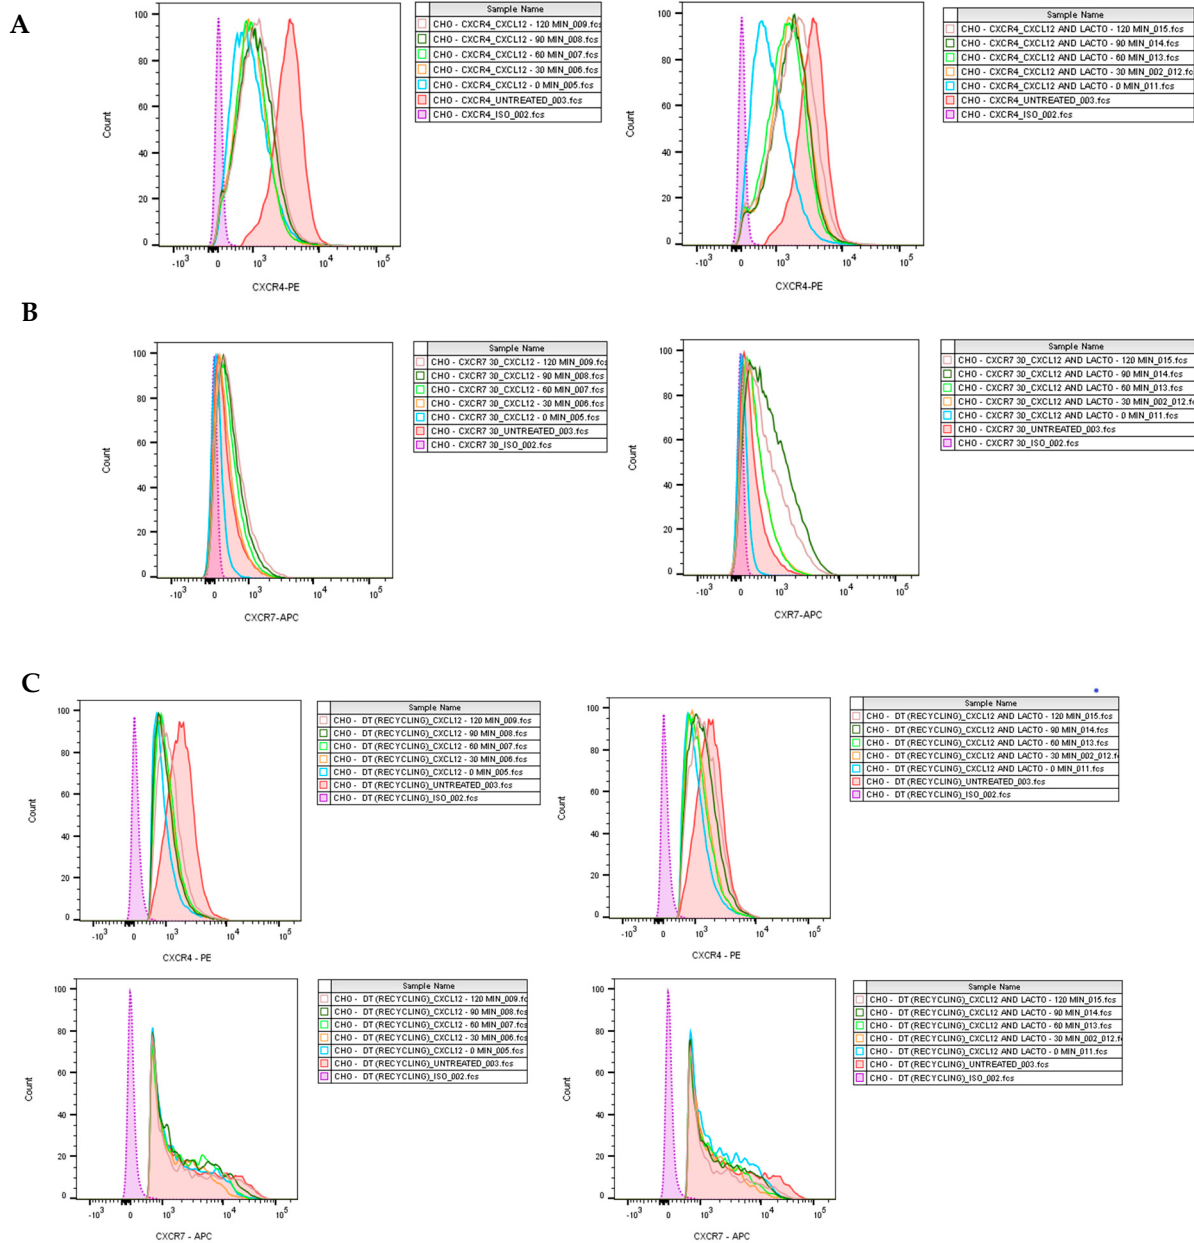

**Figure S3.** Preventing receptor degradation after CXCL12 stimulation using lactacystin, a proteasome inhibitor. (A) CHO-CXCR4, (B) CHO-ACKR3 and (C) CHO-CXCR4-ACKR3 cells were pre-treated for 1 h with 10  $\mu$ M lactacystin (a proteasome inhibitor) before incubating with 10–50 nM CXCL12 for 15–30 min. Cells were then washed and incubated with chemokine-free media for up to 2 h before being labelled with CXCR4-PE and/or ACKR3-APC antibody. Cells were labelled with CXCR4-PE and/or ACKR3-APC antibody and representative histograms of the staining are depicted.

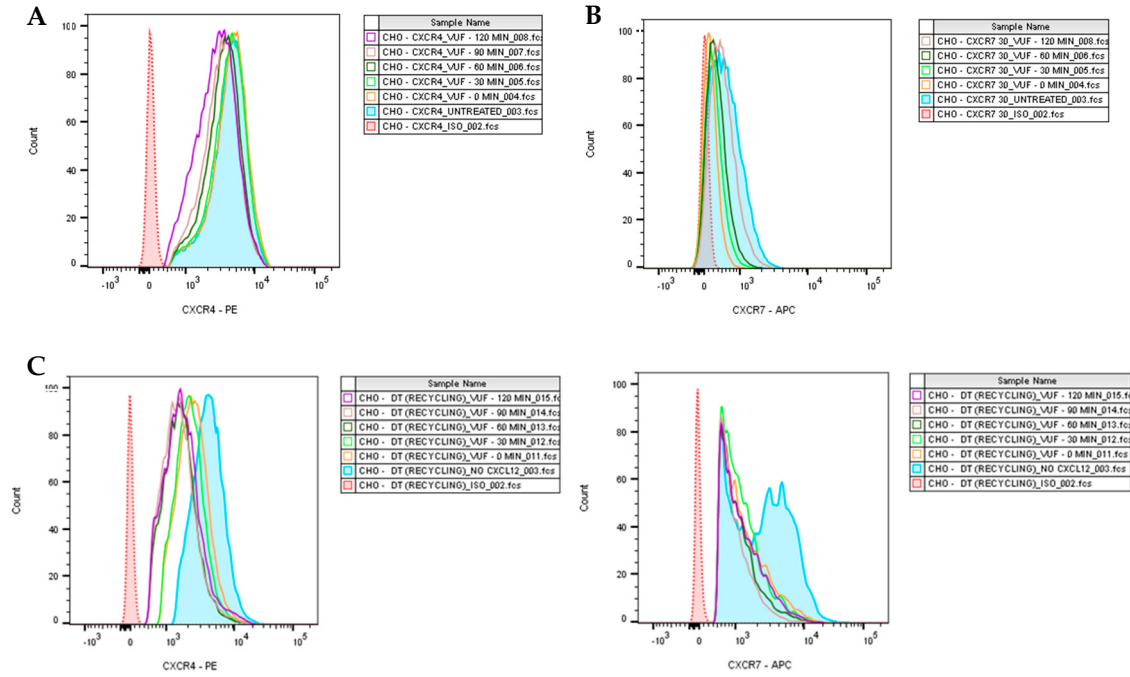

**Figure S4.** CXCR4 and ACKR3 follow different internalization pathways after VUF11207 stimulation. (A) CHO-CXCR4, (B) CHO-ACKR3 and (C) CHO-CXCR4-ACKR3 cells were stimulated with 1 nM VUF11207 for 30 min and then washed and incubated with agonist-free media for up to 2 h to assess receptor recycling. Cells were then labelled and receptor expression was measured using flow cytometry.

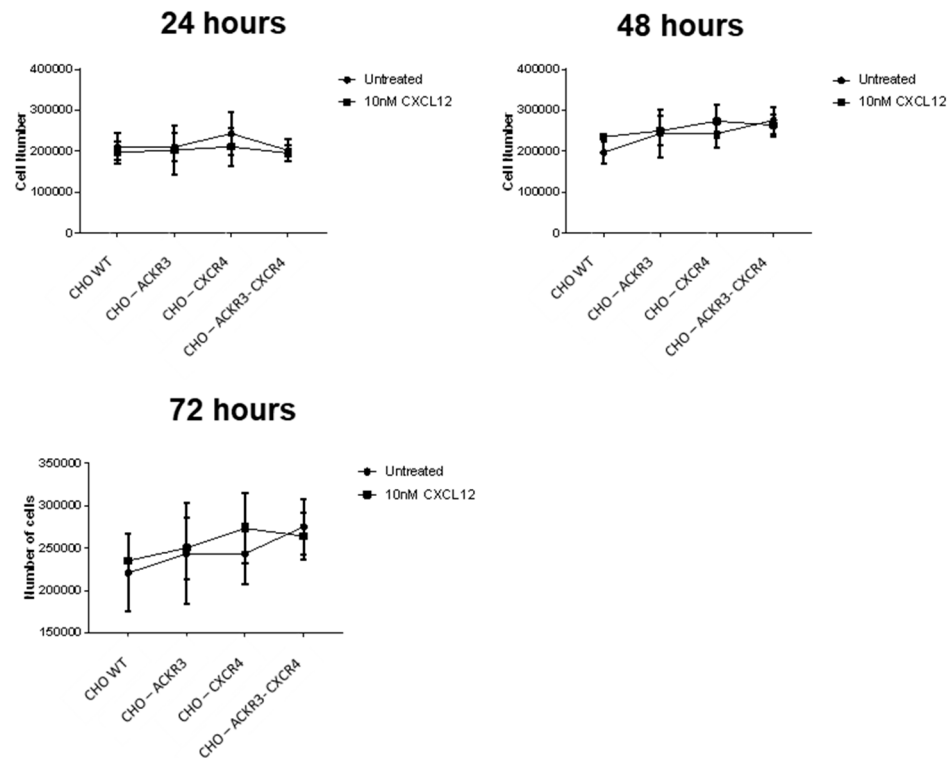

**Figure S5.** Proliferation of cells in presence and absence of 10 nm CXCL12. CHO WT, CHO-ACKR3, CHO-CXCR4 and CHO-ACKR3-CXCR4 transfectants were seeded in duplicate in a 24-well plate. After four hours, the cells were treated with 10 nM CXCL12 or were left untreated. At 24, 48 or 72 h following CXCL12 stimulation, cells were washed in PBS and detached with Accutase®. The cells were counted using a haemocytometer and analysed using Graphpad Prism.  $n = 3$ .
